# Supplementary material for: Androgen serum levels in male patients with adrenocortical carcinoma given mitotane therapy: A single center retrospective longitudinal study
Source: PubMed Central journal article supplement (PMC10108714; doi:10.3389/fendo.2023.1128061), 2023-04-05

## Supplementary Material

**Figure 1.** Consort diagram on inclusion criteria. ACC= adrenocortical carcinoma.

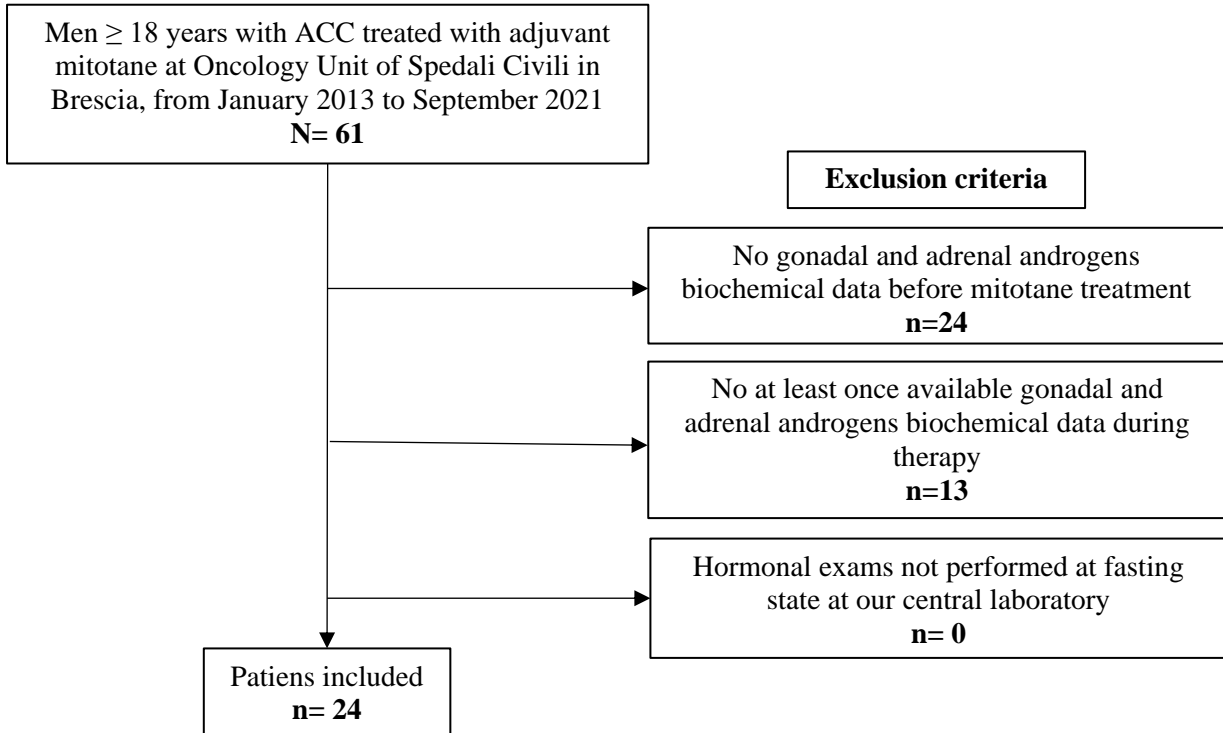

Supplement: Image_1.pdf [file Image_1.pdf]
